# Supplementary material for: Prediagnostic Calcium Intake and Lung Cancer Survival: A Pooled Analysis of 12 Cohort Studies
Source: Oxford University Press journal article supplement (doi:10.1158/1055-9965.epi-16-0863), 2017-03-06
Supplement: 10559965epi160863-sup-173820_2_supp_3880902_wlw1bp.pdf [file 10559965epi160863-sup-173820_2_supp_3880902_wlw1bp.pdf]

**Supplementary Figure S2. Forest plot of the hazard ratios of lung cancer survival in low vs. recommended dietary calcium intake<sup>a</sup>**

**A. All lung cancer patients (n=23,882)<sup>b</sup>**

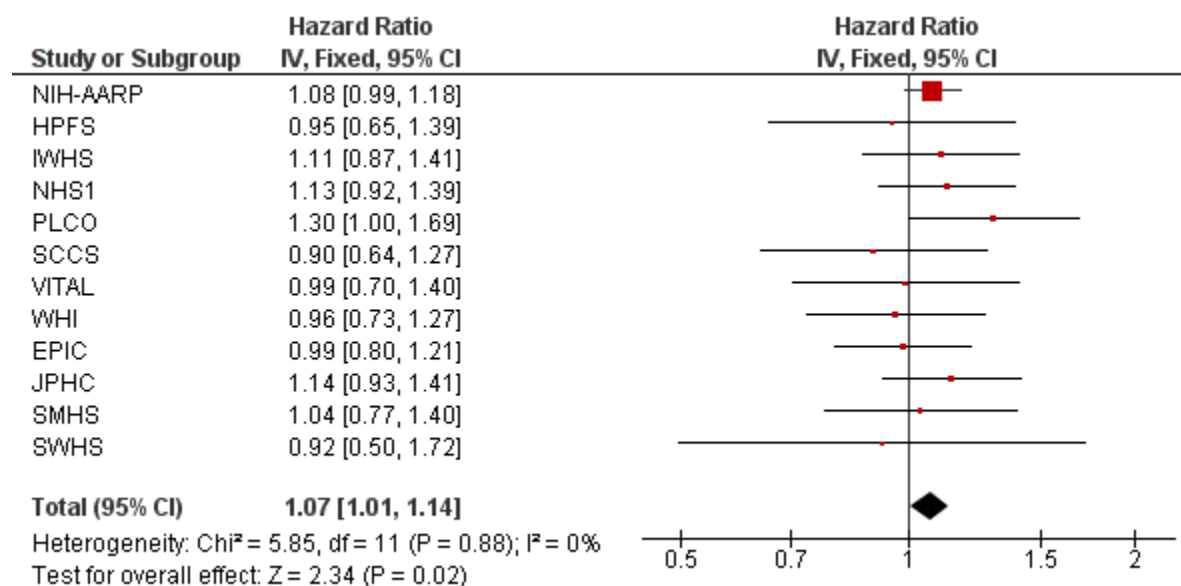

**B. Early-stage lung cancer patients (n=8013)<sup>c</sup>**

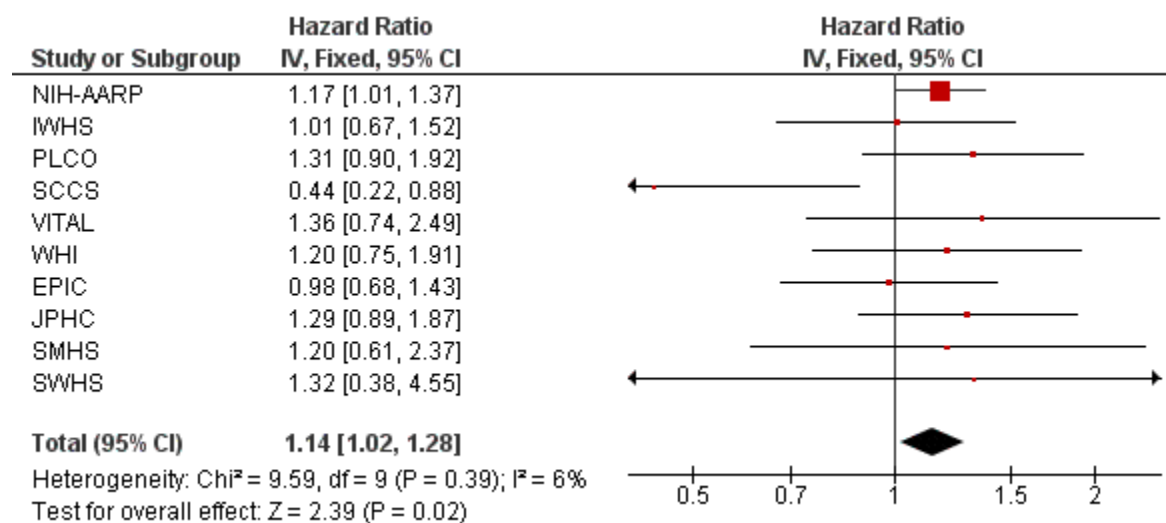

<sup>a</sup> Low calcium intake was defined as calcium intake less than half of the recommended dietary allowance (RDA), which is <500 mg/d for men  $\leq 70$  y and women  $\leq 50$  y and <600 mg/d for men >70 y and women >50 y. Recommended intake group was defined as calcium intake between estimated average requirement (EAR) and RDA, which is 800-1000 mg/d for men  $\leq 70$  y and women  $\leq 50$  y and 1000-1200 mg/d for men >70 y and women >50 y.

<sup>b</sup> If excluding results of the NIH-AARP study, the total HR (95% CI) was 1.07 (0.98, 1.16).

<sup>c</sup> If excluding results of the NIH-AARP and SCCS, the total HR (95% CI) was 1.17 (0.99, 1.38).
